# Supplementary material for: Statistical evaluation of simulated NMR data of flexible molecules
Source: Royal Society of Chemistry journal article supplement (doi:10.1039/d2cp00330a), 2022-01-01
Supplement: d2cp00330a1.pdf [file d2cp00330a1.pdf]

## Supplementary Information

### Statistic Evaluation of Simulated NMR Data of Flexible Molecules

Ulrich Sternberg and Christophe Farès

This supplementary contains the MDOC parameters and NMR data of the belizentrin precursor. The data for sagittamide A are collected in the supplementary of the paper of Sternberg *et al.*<sup>1</sup> and the data of the 1,4-diketone and of mandelalide A in the supplementary of the paper of Farès *et al.*<sup>2</sup>

Table S1: General parameters for the MDOC simulations

| Parameter                                                      | Value    |
|----------------------------------------------------------------|----------|
| Target temperature                                             | 280 K    |
| MD time step                                                   | 0.5 fs   |
| BPT atomic charge calculation                                  | At start |
| Coupling time $\eta$ to the heat bath                          | 0.02 ps  |
| Memory decay time $\tau$ for the property average              | 200 ps   |
| Time constant $\rho$ for the exponential rise of pseudo-forces | 200 ps   |
| Order parameter of the alignment medium $S_{am}$               | 0.01     |
| Enhancement factor for the torsion of $\pi$ -bonds*            | 2        |
| Use error as width                                             | true     |

\* The torsion barrier for  $\pi$ -bonds with valence 2.0 is stepped up from 94.403 kJ/mol to 188.806 kJ/mol. This enhances the stiffness of  $\pi$ -systems and prevents too large distortions by orientational pseudo-forces.

Table S2: Width and weight parameters for the pseudo forces<sup>1)</sup>.

| Belizentrin Derivate MDOC Simulations                                                                        |                           |
|--------------------------------------------------------------------------------------------------------------|---------------------------|
| Parameter                                                                                                    | Value                     |
| Pseudo-force width $\Delta D$ for the one bond CH couplings                                                  | Exp. errors as width / Hz |
| Weight parameter $k_D$ (one bond - in kJ mol <sup>-1</sup> Hz <sup>-1</sup> )                                | 0.0006                    |
| Pseudo-force width $\Delta D$ for the one long range couplings                                               | Exp. errors as width / Hz |
| Weight parameter $k_D$ (long range - in kJ mol <sup>-1</sup> Hz <sup>-1</sup> )                              | 0.0006                    |
| Pseudo-force width $\Delta R$ for the NOE distance constraints                                               | Exp. errors as width / Å  |
| Weight parameter $k_R$ (NOE distances - in kJ mol <sup>-1</sup> Å <sup>-1</sup> )                            | 0.25                      |
| Pseudo-force width $\Delta J$ for the <sup>3</sup> J <sub>HH</sub> coupling constraints                      | Exp. errors as width / Hz |
| Weight parameter $k_J$ ( <sup>3</sup> J <sub>HH</sub> couplings - in kJ mol <sup>-1</sup> Hz <sup>-1</sup> ) | 6.0                       |
| Total MD duration                                                                                            | 20 ns                     |

<sup>1)</sup> U. Sternberg, P. Tzvetkova, and C. Muhle-Goll, The Simulation of NMR Data of Flexible Molecules - Sagittamide A as Example for MD Simulations with Orientational Constraints; Phys. Chem. Chem. Phys., 2020, DOI: 10.1039/D0CP01905D.

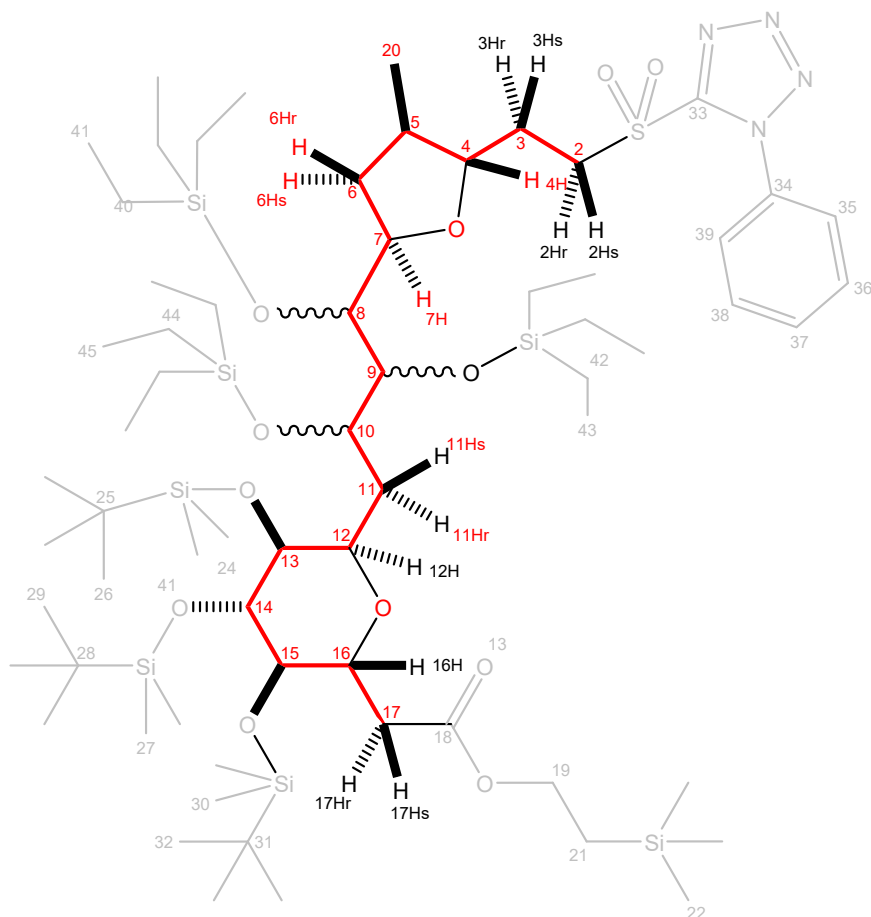

Figure S1: Derivate of belizentrin precursor with (trimethylsilyl)ethyl, triethylsilyl, and *tert*-butyldimethylsilyl protecting groups. The CH<sub>2</sub> carbon atoms of the triethylsilyl groups are denoted using big letters A, B and C and the protons using small letters a, b and c.

Table S3: Experimental RDC values and MDOC simulated values of the derivate of belizentrin precursor in C8(R), C9(R) and C10(S) configuration. Only values connected to the linker carbons C8-C11 and protons are included. Outlier  $(1/\chi)^2 < 1$  in red.

| Atom A  | Atom B  | RDC / Hz<br>Exp. | RDC / Hz<br>MDOC Sim. | Error / Hz | Diff. / Hz<br>Exp.-Sim. | $(1/\chi)^2$ |
|---------|---------|------------------|-----------------------|------------|-------------------------|--------------|
| H10     | C10     | 1.67             | 1.6806                | 0.47       | -0.011                  | 1954.907     |
| H11proR | C11     | 6.56             | 6.2216                | 0.31       | 0.338                   | 0.839        |
| H11proR | H11proS | 6.88             | 6.7909                | 1.04       | 0.089                   | 136.315      |
| H11proR | H12     | 0.4              | 0.2116                | 0.4        | 0.188                   | 4.508        |
| H11proS | C11     | 5.71             | 5.2422                | 0.41       | 0.468                   | 0.768        |
| H9      | C9      | -0.08            | -0.2441               | 0.54       | 0.164                   | 10.834       |
| H8      | C8      | 8.66             | 8.2555                | 0.37       | 0.404                   | 0.837        |
| H43Bc   | C43B    | -0.49            | -0.4813               | 0.41       | -0.009                  | 2208.483     |
| H43Ba   | C43B    | -0.49            | -0.4759               | 0.41       | -0.014                  | 845.968      |
| H43Bb   | C43B    | -0.49            | -0.4833               | 0.41       | -0.007                  | 3725.98      |
| H43Aa   | C43A    | -0.49            | -0.4818               | 0.41       | -0.008                  | 2522.946     |
| H43Ab   | C43A    | -0.49            | -0.4766               | 0.41       | -0.013                  | 936.743      |
| H43Ac   | C43A    | -0.49            | -0.4877               | 0.41       | -0.002                  | 30891.805    |
| H43Cc   | C43C    | -0.49            | -0.4786               | 0.41       | -0.011                  | 1290.007     |
| H43Ca   | C43C    | -0.49            | -0.4823               | 0.41       | -0.008                  | 2805.45      |
| H43Cb   | C43C    | -0.49            | -0.4903               | 0.41       | 0                       | 1.52367E6    |
| H45Cc   | C45C    | -0.38            | -0.3763               | 0.45       | -0.004                  | 14521.457    |
| H45Cb   | C45C    | -0.38            | -0.3727               | 0.45       | -0.007                  | 3771.893     |
| H45Ca   | C45C    | -0.38            | -0.3809               | 0.45       | 1E-3                    | 269508.188   |
| H45Ac   | C45A    | -0.38            | -0.3719               | 0.45       | -0.008                  | 3080.861     |
| H45Aa   | C45A    | -0.38            | -0.372                | 0.45       | -0.008                  | 3134.721     |
| H45Ab   | C45A    | -0.38            | -0.3827               | 0.45       | 0.003                   | 28823.498    |

|       |      |       |         |      |        |            |
|-------|------|-------|---------|------|--------|------------|
| H45Bc | C45B | -0.38 | -0.3762 | 0.45 | -0.004 | 14354.966  |
| H45Ba | C45B | -0.38 | -0.3753 | 0.45 | -0.005 | 9031.995   |
| H45Bb | C45B | -0.38 | -0.3767 | 0.45 | -0.003 | 19062.629  |
| H41Aa | C41A | -0.11 | -0.1082 | 0.17 | -0.002 | 8457.638   |
| H41Ac | C41A | -0.11 | -0.1049 | 0.17 | -0.005 | 1129.193   |
| H41Ab | C41A | -0.11 | -0.1096 | 0.17 | 0      | 221504.562 |
| H41Ca | C41C | -0.11 | -0.102  | 0.17 | -0.008 | 453.156    |
| H41Cb | C41C | -0.11 | -0.1072 | 0.17 | -0.003 | 3796.396   |
| H41Cc | C41C | -0.11 | -0.1099 | 0.17 | 0      | 1.9716E6   |
| H41Bc | C41B | -0.11 | -0.1124 | 0.17 | 0.002  | 4907.831   |
| H41Ba | C41B | -0.11 | -0.1101 | 0.17 | 0      | 7.03012E6  |
| H41Bb | C41B | -0.11 | -0.1026 | 0.17 | -0.007 | 527.27     |

Nr. Values/ $\chi^2$ : 34/4.022 = 8.454                      Number of outliers: 3

Minimum  $1/\chi_i^2$ : 0.768206

Table S4: Experimental NOE distances and MDOC simulated values of the derivative of belizentrin precursor in C8(R), C9(R) and C10(S) configuration. Only values of linker carbons C8-C11 and protons are included. Outlier  $(1/\chi_i)^2 < 1$  in red.

| Atom A  | Atom B  | NOE Dist. / Å<br>Exp. | NOE Dist. / Å<br>MDOC Sim. | Error / Å | Diff. / Å<br>Exp.-Sim. | $(1/\chi_i)^2$ |
|---------|---------|-----------------------|----------------------------|-----------|------------------------|----------------|
| H7      | H8      | 3.3                   | 2.704                      | 0.8       | 0.596                  | 1.803          |
| H4      | H8      | 3.6                   | 3.518                      | 0.7       | 0.082                  | 72.396         |
| H10     | H11proR | 2.8                   | 2.6                        | 0.7       | 0.2                    | 12.306         |
| H10     | H11proS | 2.9                   | 2.632                      | 0.7       | 0.268                  | 6.812          |
| H10     | H12     | 3.2                   | 3.028                      | 0.6       | 0.172                  | 12.135         |
| H10     | H17proR | 4                     | 4.104                      | 0.7       | -0.104                 | 45.643         |
| H10     | H8      | 3.2                   | 3.027                      | 0.6       | 0.173                  | 12.01          |
| H10     | H26Ba   | 6.8                   | 6.522                      | 1.6       | 0.278                  | 33.237         |
| H10     | H26Bb   | 6.8                   | 7.323                      | 1.6       | -0.523                 | 9.364          |
| H10     | H26Bc   | 6.8                   | 6.306                      | 1.6       | 0.494                  | 10.505         |
| H10     | H26Ca   | 6.8                   | 6.595                      | 1.6       | 0.205                  | 60.835         |
| H10     | H26Cb   | 6.8                   | 6.976                      | 1.6       | -0.176                 | 82.639         |
| H10     | H26Cc   | 6.8                   | 6.397                      | 1.6       | 0.403                  | 15.793         |
| H10     | H26Aa   | 6.8                   | 6.89                       | 1.6       | -0.09                  | 314.111        |
| H10     | H26Ab   | 6.8                   | 6.701                      | 1.6       | 0.099                  | 261.252        |
| H10     | H26Ac   | 6.8                   | 6.465                      | 1.6       | 0.335                  | 22.855         |
| H10     | H42Aa   | 4.4                   | 4.379                      | 1.1       | 0.021                  | 2700.684       |
| H10     | H42Ab   | 4.4                   | 4.366                      | 1.1       | 0.034                  | 1075.311       |
| H10     | H42Ca   | 4.4                   | 4.425                      | 1.1       | -0.025                 | 1989.449       |
| H10     | H42Cb   | 4.4                   | 4.422                      | 1.1       | -0.022                 | 2431.587       |
| H10     | H42Bb   | 4.4                   | 4.498                      | 1.1       | -0.098                 | 125.589        |
| H10     | H42Ba   | 4.4                   | 4.478                      | 1.1       | -0.078                 | 198.384        |
| H10     | H44Ba   | 3.6                   | 3.537                      | 0.9       | 0.063                  | 202.497        |
| H10     | H44Bb   | 3.6                   | 3.588                      | 0.9       | 0.012                  | 5967.334       |
| H10     | H44Ab   | 3.6                   | 3.631                      | 0.9       | -0.031                 | 823.843        |
| H10     | H44Aa   | 3.6                   | 3.555                      | 0.9       | 0.045                  | 405.702        |
| H10     | H44Ca   | 3.6                   | 3.575                      | 0.9       | 0.025                  | 1259.006       |
| H10     | H41Aa   | 5.1                   | 5.292                      | 1.2       | -0.192                 | 39.043         |
| H10     | H41Ac   | 5.1                   | 5.3                        | 1.2       | -0.2                   | 35.931         |
| H10     | H41Ab   | 5.1                   | 5.325                      | 1.2       | -0.225                 | 28.555         |
| H10     | H41Ca   | 5.1                   | 5.295                      | 1.2       | -0.195                 | 37.946         |
| H10     | H41Ca   | 5.1                   | 5.303                      | 1.2       | -0.203                 | 34.869         |
| H10     | H41Cc   | 5.1                   | 5.322                      | 1.2       | -0.222                 | 29.272         |
| H10     | H41Bc   | 5.1                   | 5.3                        | 1.2       | -0.2                   | 35.9           |
| H10     | H41Ba   | 5.1                   | 5.302                      | 1.2       | -0.202                 | 35.347         |
| H10     | H41Bb   | 5.1                   | 5.318                      | 1.2       | -0.218                 | 30.275         |
| H11proR | H8      | 2.8                   | 2.926                      | 0.5       | -0.126                 | 15.756         |
| H11proR | H44Ba   | 3.8                   | 3.764                      | 0.9       | 0.036                  | 619.785        |
| H11proR | H44Bb   | 3.8                   | 3.77                       | 0.9       | 0.03                   | 912.898        |
| H11proR | H44Ab   | 3.8                   | 3.785                      | 0.9       | 0.015                  | 3822.26        |
| H11proR | H44Aa   | 3.8                   | 3.754                      | 0.9       | 0.046                  | 375.162        |
| H11proR | H44Ca   | 3.8                   | 3.724                      | 0.9       | 0.076                  | 140.933        |

|         |        |     |       |     |        |           |
|---------|--------|-----|-------|-----|--------|-----------|
| H11proR | H41Aa  | 6   | 6.055 | 1.4 | -0.055 | 636.927   |
| H11proR | H41Ac  | 6   | 6.059 | 1.4 | -0.059 | 567.098   |
| H11proR | H41Ab  | 6   | 6.071 | 1.4 | -0.071 | 390.935   |
| H11proR | H41Ca  | 6   | 6.038 | 1.4 | -0.038 | 1338.421  |
| H11proR | H41Cb  | 6   | 6.047 | 1.4 | -0.047 | 880.089   |
| H11proR | H41Cc  | 6   | 6.06  | 1.4 | -0.06  | 544.366   |
| H11proR | H41Bc  | 6   | 6.06  | 1.4 | -0.06  | 547.375   |
| H11proR | H41Ba  | 6   | 6.076 | 1.4 | -0.076 | 336.356   |
| H11proR | H41Bb  | 6   | 6.079 | 1.4 | -0.079 | 314.792   |
| H11proS | H12    | 2.8 | 2.551 | 0.7 | 0.249  | 7.878     |
| H11proS | H13    | 2.8 | 2.708 | 0.5 | 0.092  | 29.633    |
| H11proS | H15    | 3.5 | 5.225 | 0.6 | -1.725 | 0.121     |
| H11proS | H29Bc  | 7.2 | 6.852 | 1.7 | 0.348  | 23.832    |
| H11proS | H29Bb  | 7.2 | 7.81  | 1.7 | -0.61  | 7.768     |
| H11proS | H29Ba  | 7.2 | 6.826 | 1.7 | 0.374  | 20.646    |
| H11proS | H29Aa  | 7.2 | 7.39  | 1.7 | -0.19  | 80.1      |
| H11proS | H29Ac  | 7.2 | 7.17  | 1.7 | 0.03   | 3158.117  |
| H11proS | H29Ab  | 7.2 | 6.893 | 1.7 | 0.307  | 30.638    |
| H11proS | H29Ca  | 7.2 | 6.809 | 1.7 | 0.391  | 18.889    |
| H11proS | H29Cb  | 7.2 | 7.107 | 1.7 | 0.093  | 337.567   |
| H11proS | H29Cc  | 7.2 | 7.393 | 1.7 | -0.193 | 77.428    |
| H11proS | H42Aa  | 4.1 | 4.115 | 1   | -0.015 | 4406.154  |
| H11proS | H42Ab  | 4.1 | 4.091 | 1   | 0.009  | 11297.828 |
| H11proS | H42Ca  | 4.1 | 4.079 | 1   | 0.021  | 2372.369  |
| H11proS | H42Cb  | 4.1 | 4.062 | 1   | 0.038  | 680.359   |
| H11proS | H42Bb  | 4.1 | 4.026 | 1   | 0.074  | 184.583   |
| H11proS | H42Ba  | 4.1 | 4.063 | 1   | 0.037  | 728.432   |
| H11proS | H44Ba  | 3.9 | 3.828 | 0.9 | 0.072  | 157.857   |
| H11proS | H44Bb  | 3.9 | 3.762 | 0.9 | 0.138  | 42.46     |
| H11proS | H44Ab  | 3.9 | 3.724 | 0.9 | 0.176  | 26.158    |
| H11proS | H44Aa  | 3.9 | 3.813 | 0.9 | 0.087  | 106.887   |
| H11proS | H44Ca  | 3.9 | 3.769 | 0.9 | 0.131  | 46.879    |
| H11proS | H41Aa  | 6.7 | 6.468 | 1.6 | 0.232  | 47.418    |
| H11proS | H41Ac  | 6.7 | 6.468 | 1.6 | 0.232  | 47.52     |
| H11proS | H41Ab  | 6.7 | 6.482 | 1.6 | 0.218  | 53.928    |
| H11proS | H41Ca  | 6.7 | 6.465 | 1.6 | 0.235  | 46.495    |
| H11proS | H41Cb  | 6.7 | 6.468 | 1.6 | 0.232  | 47.449    |
| H11proS | H41Cc  | 6.7 | 6.48  | 1.6 | 0.22   | 53.019    |
| H11proS | H41Bc  | 6.7 | 6.421 | 1.6 | 0.279  | 32.775    |
| H11proS | H41Ba  | 6.7 | 6.446 | 1.6 | 0.254  | 39.658    |
| H11proS | H41Bb  | 6.7 | 6.452 | 1.6 | 0.248  | 41.777    |
| H8      | H6proR | 2.8 | 2.759 | 0.5 | 0.041  | 150.492   |
| H7      | H8     | 3.3 | 2.704 | 0.8 | 0.596  | 1.803     |

Nr. Values/ $\chi^2$ : 84/10.819 = 7.764      Number of outliers: 1 (red)

Minimum  $1/\chi^2$ : 0.120995

Table S5: Experimental  $^3J_{\text{HH}}$  and MDOC simulated values of the derivate of belizentrin precursor in C8(R), C9(R) and C10(S) configuration. Only values of linker carbons C8-C11 and protons are included. Outlier  $(1/\chi)^2 < 1$  in red.

| Atom A  | Atom B  | $^3J_{\text{HH}}$ coup./ Hz Exp. | $^3J_{\text{HH}}$ coup./ Hz MDOC sim. | Error / Hz | Diff. / Hz Sim.- Exp. | $(1/\chi)^2$ |
|---------|---------|----------------------------------|---------------------------------------|------------|-----------------------|--------------|
| H7      | H8      | 7.3                              | 7.34                                  | 1          | 0.04                  | 629.883      |
| H10     | H9      | 4.3                              | 4.372                                 | 1.1        | 0.072                 | 236.675      |
| H10     | H11proS | 8.2                              | 8.132                                 | 1.1        | -0.068                | 259.334      |
| H10     | H11proR | 1.3                              | 2.817                                 | 1.1        | 1.517                 | 0.526        |
| H11proS | H12     | 1.3                              | 3.257                                 | 1.3        | 1.957                 | 0.441        |
| H9      | H8      | 3.4                              | 4.06                                  | 1.2        | 0.66                  | 3.307        |

Nr. Values/ $\chi^2$ : 6/4.480 = 1.339      Number of outliers: 2 (red)

Minimum  $1/\chi^2$ : 0.441295

Table S6:  $\chi$ -probabilities and  $n/\chi^2$  values from MDOC simulation of 8 linker configurations of C8, C9 and C10 of the derivate of belizentrin and 8 linker configurations with interchanged assignment of NMR data to the prochiral protons H1 lproS and H1 lproR. Only values of linker carbons C8-C11 and protons are included. Probabilities larger one in color (color scheme as used for the columns in Fig. 7 of the paper)

| Linker Conf. | NMR Data Ass. <sup>1)</sup> | Probability % RDC       | Probability % RDC+ NOE-R | Probability % RDC+NOE-R+ <sup>3</sup> J <sub>HH</sub> | $n/\chi^2$ RDC | $n/\chi^2$ RDC+ NOE-R | $n/\chi^2$ RDC+ NOE-R+ <sup>3</sup> J <sub>HH</sub> |
|--------------|-----------------------------|-------------------------|--------------------------|-------------------------------------------------------|----------------|-----------------------|-----------------------------------------------------|
| RRR          | Original                    | 0.000111954             | 0.                       | 2.4451*10 <sup>-9</sup>                               | 6.82507        | 6.00733               | 4.80282                                             |
| RRS          | Original                    | 0.0207417               | 100.                     | 99.9999                                               | 8.45419        | 10.3051               | 7.78358                                             |
| RSR          | Original                    | 0.103971                | 0.                       | 3.24923*10 <sup>-9</sup>                              | 9.07945        | 5.83469               | 4.97735                                             |
| RSS          | Original                    | 14.3816                 | 0.                       | 2.32981*10 <sup>-7</sup>                              | 12.3442        | 6.23716               | 5.19537                                             |
| SRR          | Original                    | 78.1138                 | 0.                       | 2.63553*10 <sup>-7</sup>                              | 14.103         | 6.53878               | 5.26571                                             |
| SRS          | Original                    | 0.000781544             | 0.                       | 3.71121*10 <sup>-13</sup>                             | 7.30243        | 5.83564               | 4.57441                                             |
| SSR          | Original                    | 0.291541                | 0.                       | 0.0000117827                                          | 9.80178        | 6.46294               | 5.39065                                             |
| SSS          | Original                    | 6.83822                 | 0.                       | 2.84426*10 <sup>-11</sup>                             | 12.0915        | 6.16841               | 4.72633                                             |
| RRR          | Ex11                        | 0.000946909             | 0.                       | 1.48275*10 <sup>-6</sup>                              | 7.19894        | 6.27571               | 5.27176                                             |
| RRS          | Ex11                        | 0.00195017              | 0.                       | 1.0623*10 <sup>-10</sup>                              | 7.67583        | 6.28445               | 4.66083                                             |
| RSR          | Ex11                        | 0.0225336               | 0.                       | 2.83727*10 <sup>-6</sup>                              | 8.46939        | 6.42406               | 5.49821                                             |
| RSS          | Ex11                        | 0.110606                | 0.                       | 1.01223*10 <sup>-8</sup>                              | 9.0976         | 6.40655               | 5.14541                                             |
| SRR          | Ex11                        | 0.0108537               | 0.                       | 8.45117*10 <sup>-13</sup>                             | 8.22427        | 6.19789               | 4.43679                                             |
| SRS          | Ex11                        | 1.9048*10 <sup>-9</sup> | 0.                       | 2.35494*10 <sup>-16</sup>                             | 4.68119        | 5.41305               | 4.00337                                             |
| SSR          | Ex11                        | 0.0131899               | 0.                       | 8.20619*10 <sup>-11</sup>                             | 8.10673        | 6.2535                | 4.69297                                             |
| SSS          | Ex11                        | 0.0891395               | 0.                       | 3.48751*10 <sup>-10</sup>                             | 9.09274        | 6.41119               | 4.72253                                             |
| $\sigma^2$ ) |                             | 0.33                    | 0.40                     | 0.45                                                  |                |                       |                                                     |

<sup>1)</sup> Assignment of NMR to the prochiral protons H1 lproS and H1 lproR : Original - data as given in Tables S3, S4 and S5. Ex11 – prochiral assignment of the two protons H1 lproS and H1 lproR exchanged.

<sup>2)</sup> Standard deviation  $\sigma$  of the  $\chi$  values as used for the  $\chi$ -probability calculation

<sup>1</sup> Sternberg, U.; Tzvetkova, P.; Muhle-Goll, C., The simulation of NMR data of flexible molecules: sagittamide A as an example for MD simulations with orientational constraints. *Phys Chem Chem Phys* **2020**, *22* (30), 17375-17384.

<sup>2</sup> Farès, C.; Lingnau, J. B.; Wirtz, C.; Sternberg, U., Conformational Investigations in Flexible Molecules Using Orientational NMR Constraints in Combination with (3)J-Couplings and NOE Distances. *Molecules* **2019**, *24* (23).
